# Supplementary material
Source: publisher figshare collection journal article supplement (https://springernature.figshare.com/ndownloader/files/38288340)
Supplement: Supplementary file 1 [file 38288340]

Table S1.Pre and Post-Deployment sensor calibrations

| Pre-Deployment—July 5, 2018 | | |  |
| --- | --- | --- | --- |
| Depth Error |  |  |  |
| **Expected (m)** | Measured (m) | **Error (m)** | Error (%FS) |
| **0.0** | 0.5 | **0.5** | 0.03 |
| **20.0** | 21.0 | **1.0** | 0.06 |
| **60.0** | 61.0 | **1.0** | 0.06 |
| **100.0** | 101.0 | **1.0** | 0.06 |
| **200.0** | 200.0 | **0.0** | 0.00 |
| **400.0** | 399.5 | **-0.5** | -0.03 |
| **800.0** | 798.5 | **-1.5** | -0.09 |
| **1200.0** | 1198.0 | **-2.0** | -0.12 |
| **1700.0** | 1697.0 | **-3.0** | -0.18 |
| Depth-Temperature Error | |  |  |
| Temperature (deg C) | **Expected (m)** | **Error (m)** | Error (%FS) |
| 2.00 | **0.0** | **0.5** | 0.03 |
| 5.00 | **0.0** | **0.5** | 0.03 |
| 10.00 | **0.0** | **0.5** | 0.03 |
| 15.00 | **0.0** | **0.5** | 0.03 |
| 20.00 | **0.0** | **0.5** | 0.03 |
| 25.00 | **0.0** | **0.5** | 0.03 |
| 30.00 | **0.0** | **0.5** | 0.03 |
| 35.00 | **0.0** | **0.5** | 0.03 |
| 40.00 | **0.0** | **0.5** | 0.03 |
| Temperature Error | |  |  |
| **Expected (deg C)** | Measured (deg C) | **Error (deg C)** |  |
| **2.00** | 2.00 | **0.00** |  |
| **5.00** | 5.00 | **0.00** |  |
| **10.00** | 10.00 | **0.00** |  |
| **15.00** | 15.00 | **0.00** |  |
| **20.00** | 20.00 | **0.00** |  |
| **25.00** | 24.95 | **-0.05** |  |
| **30.00** | 29.95 | **-0.05** |  |
| **35.00** | 34.95 | **-0.05** |  |
| **40.00** | 39.95 | **-0.05** |  |

| Post-Deployment—October 27, 2021 | | |  |
| --- | --- | --- | --- |
| Depth Error |  |  |  |
| **Expected (m)** | Measured (m) | **Error (m)** | Error (%FS) |
| **0.0** | -1.0 | **-1.0** | -0.06 |
| **20.0** | 19.5 | **-0.5** | -0.03 |
| **60.0** | 59.5 | **-0.5** | -0.03 |
| **100.0** | 99.0 | **-1.0** | -0.06 |
| **200.0** | 199.0 | **-1.0** | -0.06 |
| **400.0** | 399.0 | **-1.0** | -0.06 |
| **800.0** | 799.0 | **-1.0** | -0.06 |
| **1200.0** | 1199.5 | **-0.5** | -0.03 |
| **1700.0** | 1699.5 | **-0.5** | -0.03 |
| Depth-Temperature Error | |  |  |
| Temperature (deg C) | **Expected (m)** | **Error (m)** | Error (%FS) |
| 2.00 | **0.0** | **0.0** | 0.00 |
| 5.00 | **0.0** | **-0.5** | -0.03 |
| 10.00 | **0.0** | **-0.5** | -0.03 |
| 15.00 | **0.0** | **-1.0** | -0.06 |
| 20.00 | **0.0** | **-0.5** | -0.03 |
| 25.00 | **0.0** | **-0.5** | -0.03 |
| 30.00 | **0.0** | **0.0** | 0.00 |
| 35.00 | **0.0** | **0.0** | 0.00 |
| 40.00 | **0.0** | **-0.5** | -0.03 |
|  |  |  |  |
| Temperature Error | |  |  |
| **Expected (deg C)** | Measured (deg C) | **Error (deg C)** |  |
| **2.00** | 1.95 | **-0.05** |  |
| **5.00** | 5.00 | **0.00** |  |
| **10.00** | 10.00 | **0.00** |  |
| **15.00** | 15.00 | **0.00** |  |
| **20.00** | 20.00 | **0.00** |  |
| **25.00** | 25.00 | **0.00** |  |
| **30.00** | 30.00 | **0.00** |  |
| **35.00** | 34.95 | **-0.05** |  |
| **40.00** | 39.95 | **-0.05** |  |
